# Supplementary material for: Comprehensive transcriptomic analyses identify KDM genes-related subtypes with different TME infiltrates in gastric cancer
Source: Springer Nature journal article supplement (doi:10.1186/s12885-023-10923-1), 2023-05-18

Figure 2B

KDM5C

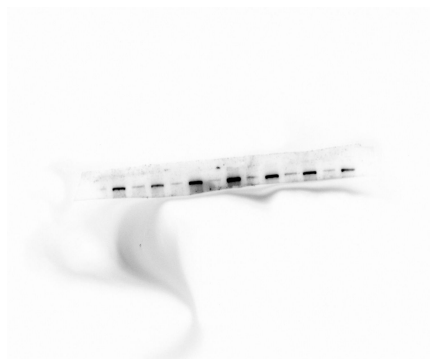

GAPDh

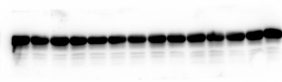

supplementary cell line 2A

KDM5C

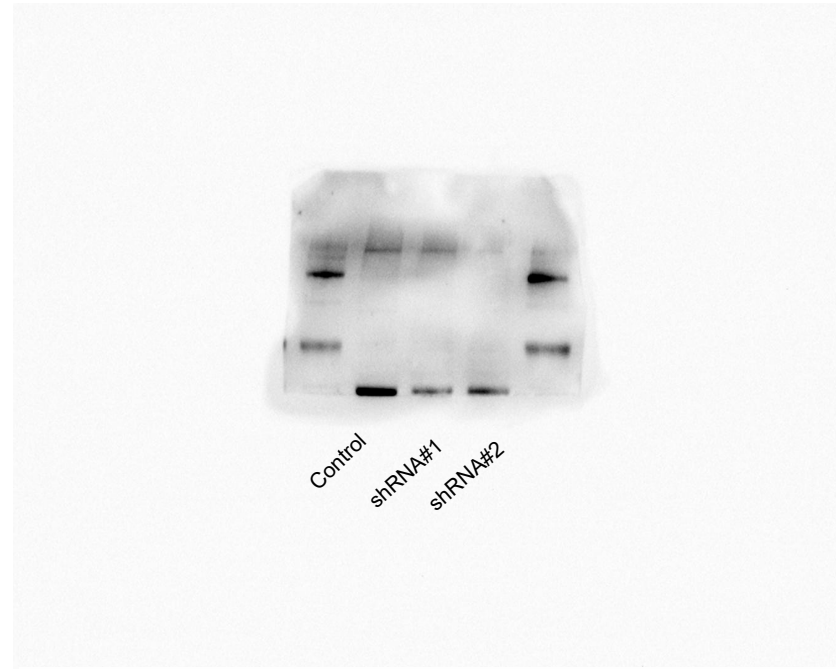

GAPDH

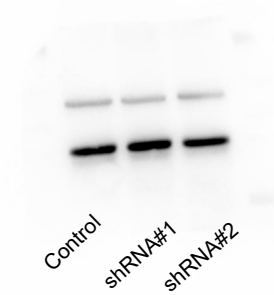

KDM5C

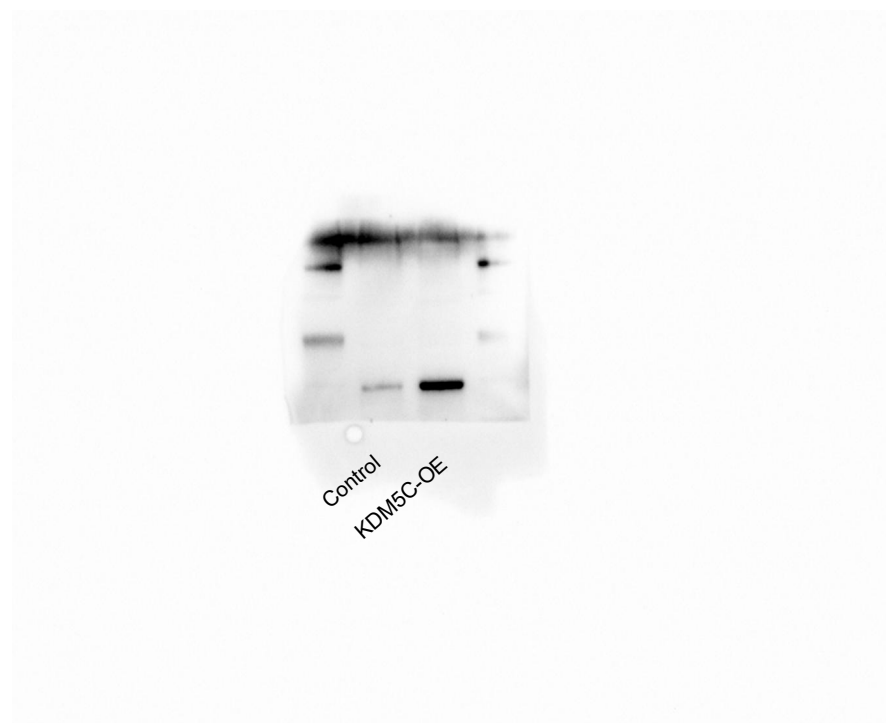

GAPDH

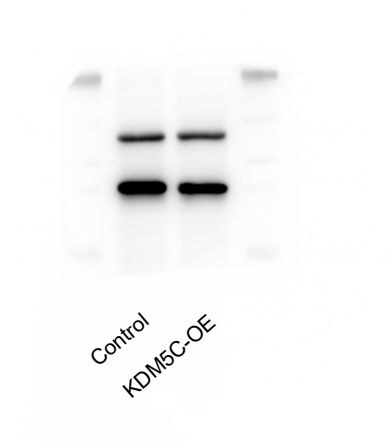

Supplement: MOESM1 [file 25378438]
