# Supplementary material for: Comprehensive transcriptomic analyses identify KDM genes-related subtypes with different TME infiltrates in gastric cancer
Source: BMC Cancer. 2023 May 18;23:454. doi: 10.1186/s12885-023-10923-1 (PMC10197475; doi:10.1186/s12885-023-10923-1)
Supplement: Supplementary file 4 — Additional file 4. Supplementary table 2 [file 12885_2023_10923_MOESM4_ESM.xlsx]

## Sheet: STADlasso_coef_final
	lasso_coef
ABCG4	0.302648
ACSS3	0.0865095
CKAP4	0.148996
FXYD1	0.314864
GAMT	0.0406633
MAP3K10	-0.0931726
PCDHB5	0.0109106
PIEZO2	0.00758379
PSMG3	0.0463888
RPS4Y1	0.00233623
SNCG	0.0797504
SYT6	0.228216
TPGS1	-0.134145
XIST	-0.0240249
KDM4A	-0.0774307
